# Supplementary material
Source: publisher figshare collection journal article supplement (https://acs.figshare.com/ndownloader/files/4189726)
Supplement: Supplementary file 1 [file 4189726]

## **Supporting Information**

### **Molecular Dynamics Simulations for Human CAR Inverse Agonists**

*Johanna Jyrkkärinne\*, Jenni Küblbeck, Juha Pulkkinen, Paavo Honkakoski, Reino*

*Laatikainen, Antti Poso and Tuomo Laitinen\**

University of Eastern Finland, Faculty of Health Sciences, School of Pharmacy, PO Box 1627,  
FI-70211 Kuopio, Finland

\*To whom the correspondence should be addressed:

Tel. +358 40 3552520 or +358 400 165489

Johanna.Jyrkkarinne@uef.fi, Tuomo.Laitinen@uef.fi

**Table S1.** Cytotoxicity data from MTT tests for the studied ligands.

| <b>Ligand<sup>a</sup></b>           | <b>Fold absorbance<sup>b</sup><br/>(DMSO = 1)</b> |
|-------------------------------------|---------------------------------------------------|
| <b>CITCO</b>                        | 1.09 ± 0.07                                       |
| <b>FL-82</b>                        | 0.97 ± 0.02                                       |
| <b>FL-81</b>                        | 0.92 ± 0.01                                       |
| <b>Permethrin</b>                   | 0.80 ± 0.11                                       |
| <b>Clotrimazole</b>                 | 1.02 ± 0.02                                       |
| <b>TPP</b>                          | 1.21 ± 0.04                                       |
| <b>Artemisin</b>                    | 1.08 ± 0.10                                       |
| <b>EE2*</b>                         | 0.93 ± 0.16                                       |
| <b>Androstanol</b>                  | n.d. <sup>c</sup>                                 |
| <b>Androstenol*</b>                 | 0.75 ± 0.08                                       |
| <b>PK11195</b>                      | 1.03 ± 0.03                                       |
| <b>S07662</b>                       | 1.13 ± 0.09                                       |
| <b>Clomifene</b>                    | n.d. <sup>c</sup>                                 |
| <b>Celecoxib</b>                    | 0.98 ± 0.02                                       |
| <b>Meclizine</b>                    | 1.26 ± 0.09                                       |
| <b>HgCl<sub>2</sub><sup>d</sup></b> | 0.04 ± <0.01                                      |

<sup>a</sup>The concentration of ligand was 10 µM. For the ligands marked with “\*” 50 µM concentration was used.

<sup>b</sup>Fold absorbance (vehicle control DMSO = 1) measured at 570 nm ± s.d.

<sup>c</sup>No data for MTT tests is available. No toxicity of these compounds was observed at 30 µM concentration when looking at the expression of β-galactosidase reporter gene which was used as a transfection control in M1H and M2H assays.

<sup>d</sup>Positive control (0.1 mM) for toxicity.

|                                 |                                       |             |
|---------------------------------|---------------------------------------|-------------|
|                                 | <b>H3-H4</b>                          | <b>H12</b>  |
| <u>hCAR</u>                     | LQVIKFTKDLFVFRSLPIEDQISLLKGA          | PLLQEICS--- |
| <u>hPPAR<math>\gamma</math></u> | TELTEFAKAIPGFANLDLNDQVTLLKYG          | PLLQEIYRDMY |
|                                 | : : : * : * * . * : : * * : : * * * . | *****       |
|                                 |                                       |             |
|                                 | <b>CoR Interaction domains</b>        |             |
| <u>SMRT</u>                     | NMGLEAIIRKALMGKYDQW                   |             |
| <u>NCoR</u>                     | NLGLEDIIRKALMGSFDDK                   |             |
|                                 | * : * * * * * * * * * * . : * :       |             |

**Figure S1.** The alignment of co-regulator interacting regions (c-terminal part of H3, H4 and H12) of hCAR and PPAR $\gamma$  and the alignment of interaction domains of SMRT and NCoR. Identical residues have been identified with “\*”, conserved substitutions with “:” and semi-conserved substitutions with “.” The most important and conserved residues in the NR interaction of SMRT and NCoR have been high-lighted with grey.

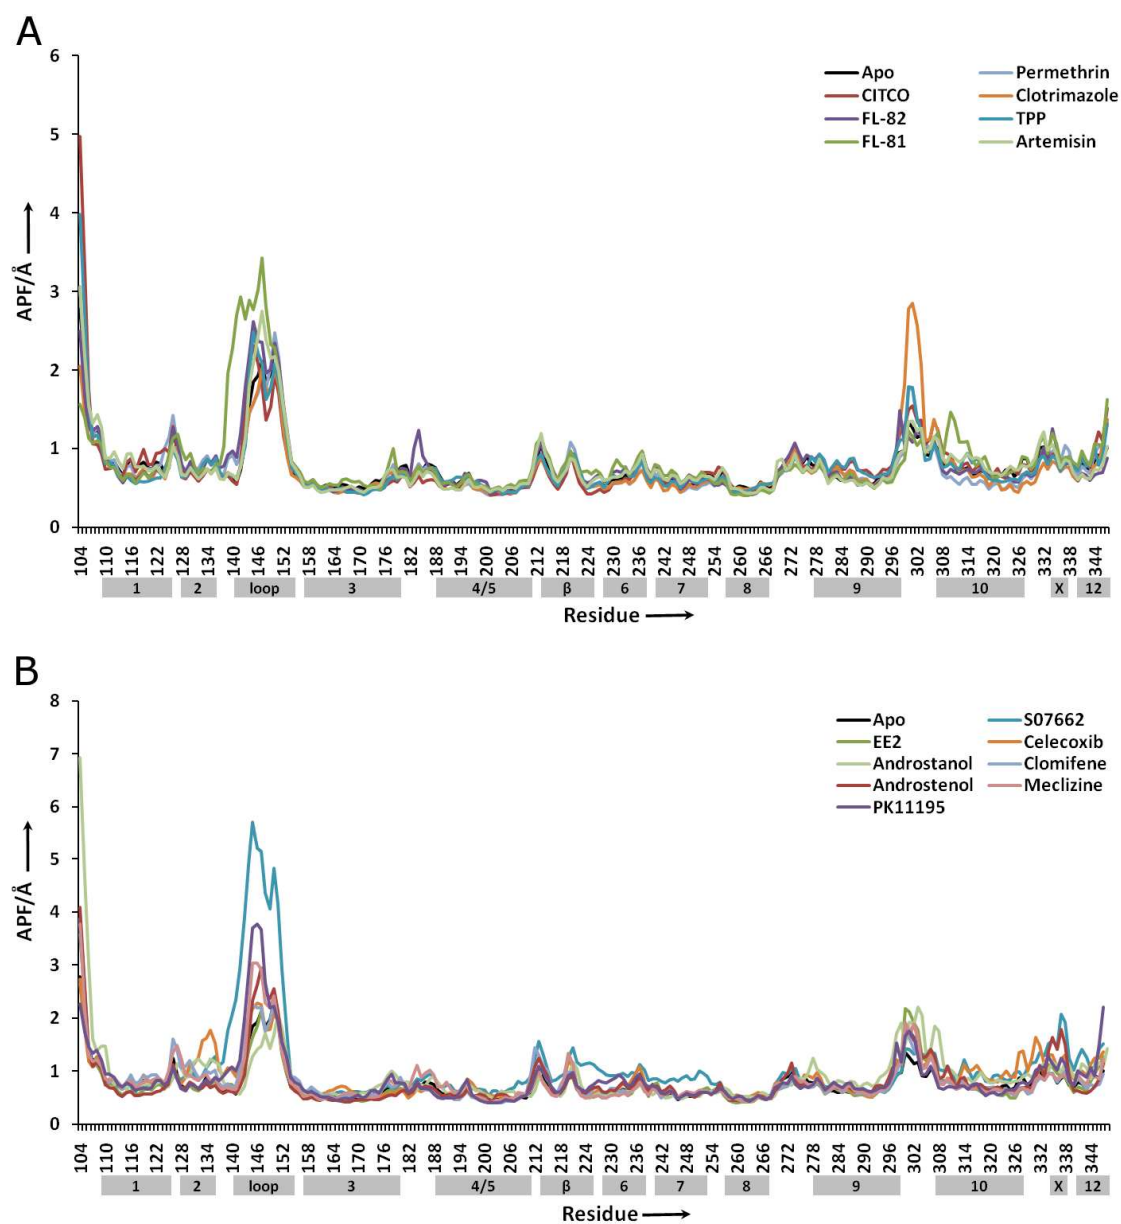

**Figure S2.** APFs of CAR LBD backbone during MDs with A) agonists and B) inverse agonists.

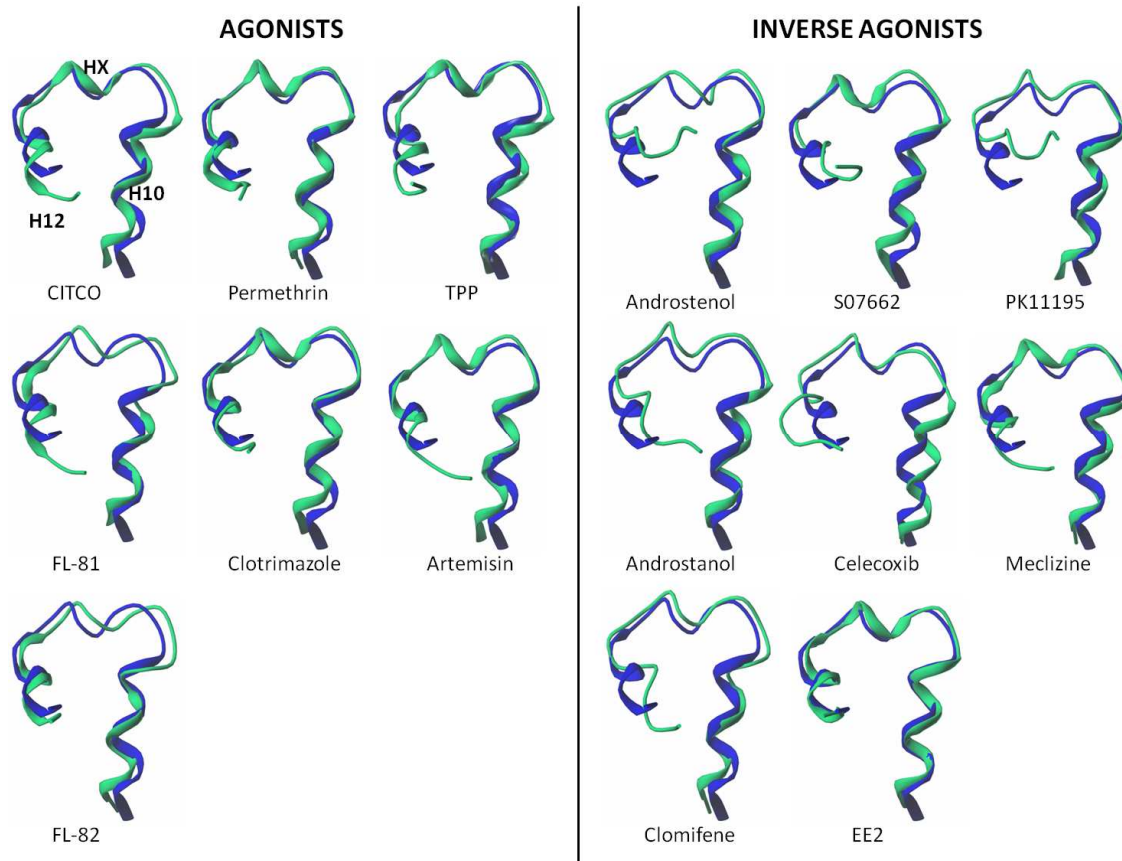

**Figure S3.** Position of H12 in the final structures of the MDs. Apo structure is shown in blue as a reference with each liganded structure (green).
